# Supplementary material for: Virus Sensor RIG-I Represses RNA Interference by Interacting with TRBP through LGP2 in Mammalian Cells
Source: MDPI journal article supplement (doi:10.3390/genes9100511), 2018-10-19
Supplement: s1 [file s1]

## Supplementary Materials for

# Virus Sensor RIG-I represses RNA interference by interacting with TRBP through LGP2 in mammalian cells

Tomoko Takahashi, Yuko Nakano, Koji Onomoto, Mitsutoshi Yoneyama and Kumiko Ui-Tei

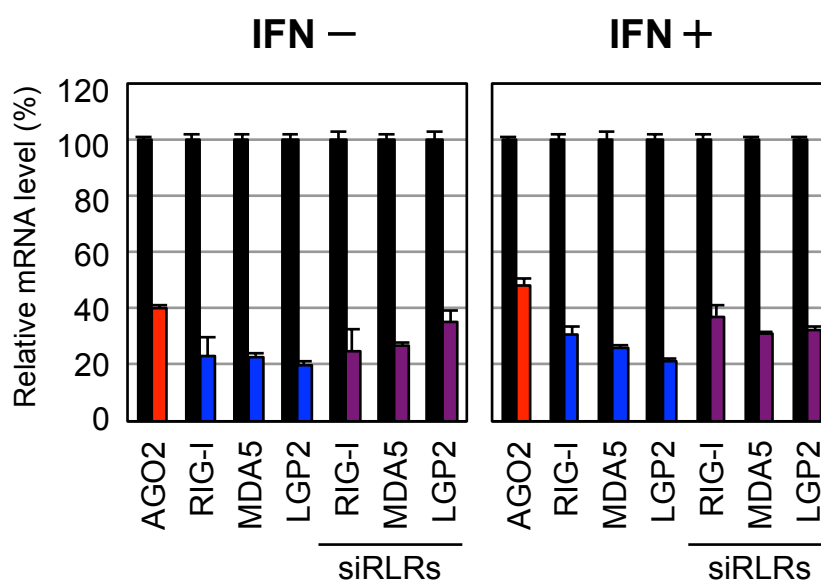

**Supplementary Figure 1. Relative mRNA level of AGO2, RIG-I, MDA5, or LGP2 in IFN-non treated or treated cells.** The mRNA level of each gene in IFN-non treated or treated cells was measured by quantitative RT-PCR. Change in the expression level of each mRNA (red, blue, purple bar) was normalized with GAPDH mRNA (black bar) in the same cells, and the relative mRNA level in IFN-non treated or treated cells was shown by normalization using the value in the control cells.

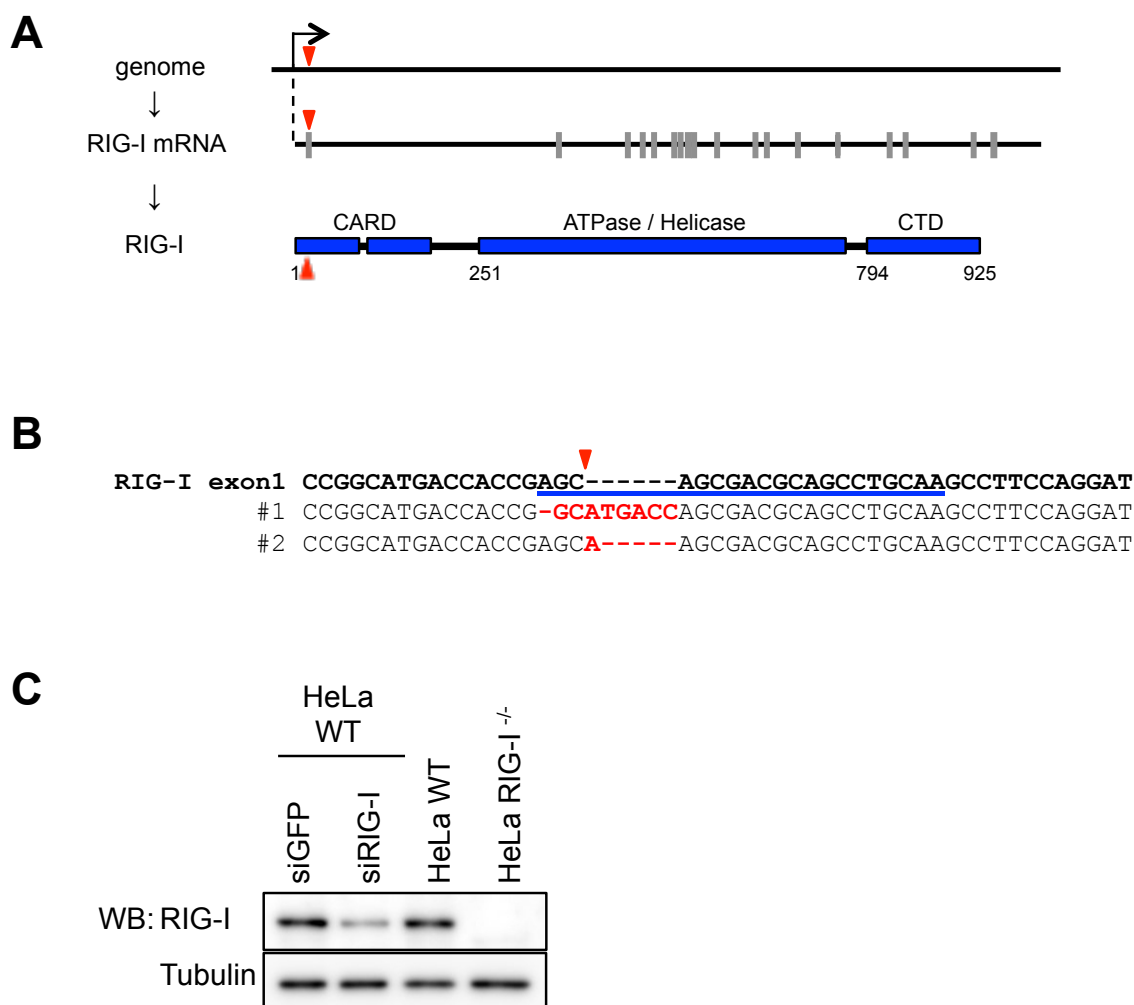

### Supplementary Figure 2. Generation of RIG-I knockout HeLa cells (RIG-I<sup>-/-</sup>).

(A) The sgRNA was designed against exon 1 of genomic RIG-I gene. Gray box and arrowhead indicate exons and the predicted cleavage site by Cas9 protein, respectively. (B) Sequence of RIG-I gene in the cloned RIG-I<sup>-/-</sup> cells. Two patterns of mutation were detected. Blue line indicates the complementary region of the used guide RNA. (C) Western blot was performed using IFN-treated wild-type HeLa cells transfected with siGFP or siRIG-I, and wild-type HeLa cells and RIG-I<sup>-/-</sup> cells.

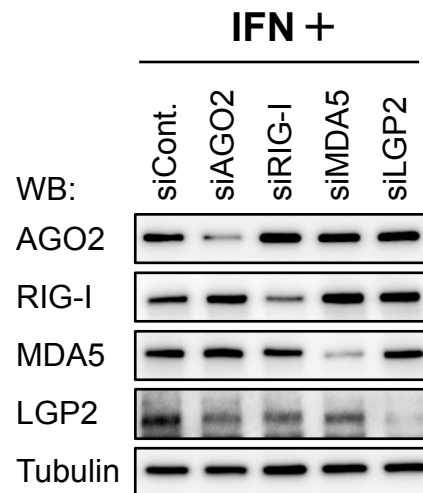

**Supplementary Figure 3. Confirmation of knockdown at protein level by transfection of siAGO2, siRIG-I, siMDA5, or siLGP2 in TRBP<sup>-/-</sup> cells.**

Western blot of IFN-treated TRBP<sup>-/-</sup> cells after transfection of each siRNA against AGO2, RIG-I, MDA5, or LGP2. The protein level derived from the knocked down mRNA was sufficiently downregulated.
